# Supplementary material
Source: bioRxiv or medRxiv preprint supplement (https://www.biorxiv.org/highwire/filestream/44946/field_highwire_adjunct_files/16/151126-9.pdf)

A

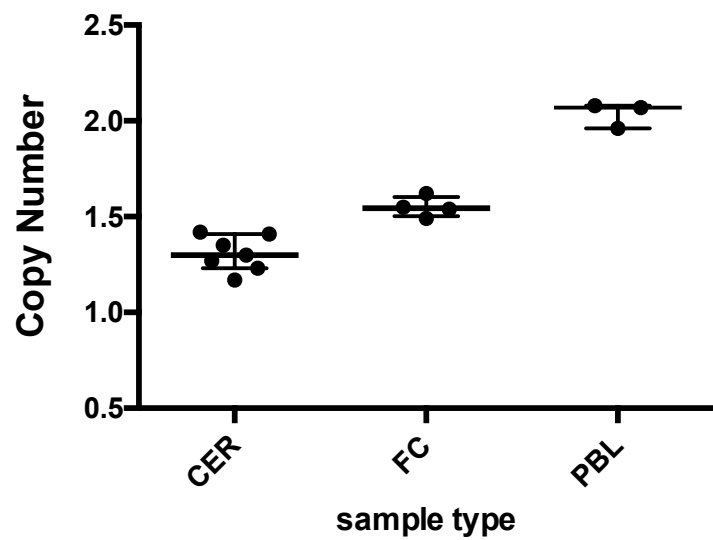

B

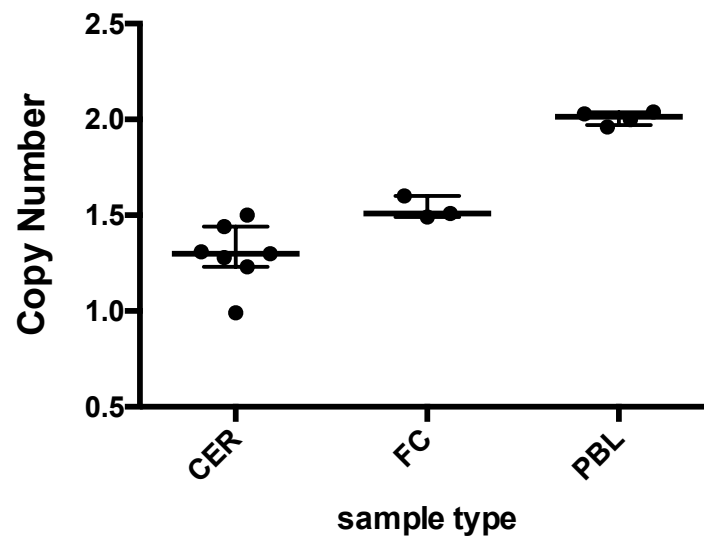

Supplement: Supplementary file [file 151126-9.pdf]
